# Supplementary material for: A Semi-Automated Method to Extract Green and Non-Photosynthetic Vegetation Cover from RGB Images in Mixed Grasslands
Source: MDPI journal article supplement (doi:10.3390/s20236870), 2020-12-01
Supplement: s1 [file s1]

Supplementary S3

| id | Vegetation community | Sample RGB picture                                                                   |
|----|----------------------|--------------------------------------------------------------------------------------|
| 1  | disturbed community  |   |
| 2  | disturbed community  |  |



|   |                        |                                                                                      |
|---|------------------------|--------------------------------------------------------------------------------------|
| 3 | disturbed<br>community |   |
| 4 | disturbed<br>community |  |



|   |                        |                                                                                      |
|---|------------------------|--------------------------------------------------------------------------------------|
| 5 | disturbed<br>community |   |
| 6 | disturbed<br>community |  |



|   |                     |                                                                                      |
|---|---------------------|--------------------------------------------------------------------------------------|
| 7 | sloped<br>grassland |   |
| 8 | sloped<br>grassland |  |



|    |                     |                                                                                      |
|----|---------------------|--------------------------------------------------------------------------------------|
| 9  | sloped<br>grassland |   |
| 10 | sloped<br>grassland |  |



|    |                     |                                                                                      |
|----|---------------------|--------------------------------------------------------------------------------------|
| 11 | sloped<br>grassland |   |
| 12 | sloped<br>grassland |  |



|    |                     |                                                                                      |
|----|---------------------|--------------------------------------------------------------------------------------|
| 13 | sloped<br>grassland |   |
| 14 | sloped<br>grassland |  |



|    |                     |                                                                                      |
|----|---------------------|--------------------------------------------------------------------------------------|
| 15 | upland<br>grassland |   |
| 16 | upland<br>grassland |  |



|    |                     |                                                                                                                                                                                                                                                                                                                                                 |
|----|---------------------|-------------------------------------------------------------------------------------------------------------------------------------------------------------------------------------------------------------------------------------------------------------------------------------------------------------------------------------------------|
| 17 | upland<br>grassland |  A photograph of a grassy field. The grass is tall and green, with some dry, yellowish-brown blades interspersed. In the center of the frame, there is a small, dense cluster of small white flowers. The background is a continuation of the grassy field.  |
| 18 | upland<br>grassland |  A photograph of a grassy field. The grass is tall and green, with some dry, yellowish-brown blades interspersed. In the center of the frame, there is a small, dense cluster of small white flowers. The background is a continuation of the grassy field. |



|    |                     |                                                                                      |
|----|---------------------|--------------------------------------------------------------------------------------|
| 19 | valley<br>grassland |   |
| 20 | valley<br>grassland |  |



|    |                     |                                                                                      |
|----|---------------------|--------------------------------------------------------------------------------------|
| 21 | valley<br>grassland |   |
| 22 | valley<br>grassland |  |



|    |                     |                                                                                      |
|----|---------------------|--------------------------------------------------------------------------------------|
| 23 | valley<br>grassland |   |
| 24 | valley<br>grassland |  |



|    |                     |                                                                                     |
|----|---------------------|-------------------------------------------------------------------------------------|
| 25 | valley<br>grassland |  |
|----|---------------------|-------------------------------------------------------------------------------------|
