# Supplementary material for: A Semi-Automated Method to Extract Green and Non-Photosynthetic Vegetation Cover from RGB Images in Mixed Grasslands
Source: MDPI journal article supplement (doi:10.3390/s20236870), 2020-12-01
Supplement: s1 [file s1]

Supplementary S2

| Id | Vegetation community | RGB picture for each quadrat                                                        |                                                                                      |                                                                                       |
|----|----------------------|-------------------------------------------------------------------------------------|--------------------------------------------------------------------------------------|---------------------------------------------------------------------------------------|
| 1  | upland grassland     |    |    |    |
|    |                      |    |    |    |
|    |                      |   |   |   |
|    |                      |  |  |  |
|    |                      |  |  |  |
|    |                      |  |  |  |
|    |                      |                                                                                     |                                                                                      |                                                                                       |



|   |                     |                                                                                     |                                                                                      |                                                                                       |
|---|---------------------|-------------------------------------------------------------------------------------|--------------------------------------------------------------------------------------|---------------------------------------------------------------------------------------|
|   |                     |    |                                                                                      |                                                                                       |
| 2 | upland<br>grassland |    |    |    |
|   |                     |    |    |    |
|   |                     |   |   |   |
|   |                     |  |  |  |
|   |                     |  |  |  |
|   |                     |  |  |  |
|   |                     |                                                                                     |                                                                                      |                                                                                       |



|   |                     |                                                                                     |                                                                                      |                                                                                       |
|---|---------------------|-------------------------------------------------------------------------------------|--------------------------------------------------------------------------------------|---------------------------------------------------------------------------------------|
|   |                     |    |    |                                                                                       |
| 3 | upland<br>grassland |    |    |    |
|   |                     |    |    |    |
|   |                     |   |   |   |
|   |                     |  |  |  |
|   |                     |  |  |  |
|   |                     |  |  |  |



|   |                     |                                                                                     |                                                                                      |                                                                                       |
|---|---------------------|-------------------------------------------------------------------------------------|--------------------------------------------------------------------------------------|---------------------------------------------------------------------------------------|
|   |                     |    |    |                                                                                       |
| 4 | upland<br>grassland |    |    |    |
|   |                     |    |    |    |
|   |                     |   |   |   |
|   |                     |  |  |  |
|   |                     |  |  |  |
|   |                     |  |  |  |
|   |                     |                                                                                     |                                                                                      |                                                                                       |



|   |                     |                                                                                     |                                                                                      |                                                                                       |
|---|---------------------|-------------------------------------------------------------------------------------|--------------------------------------------------------------------------------------|---------------------------------------------------------------------------------------|
|   |                     |    |    |                                                                                       |
| 5 | valley<br>grassland |    |    |    |
|   |                     |    |    |    |
|   |                     |   |   |   |
|   |                     |  |  |  |
|   |                     |  |  |  |
|   |                     |  |  |  |



|   |                     |                                                                                     |                                                                                      |                                                                                       |
|---|---------------------|-------------------------------------------------------------------------------------|--------------------------------------------------------------------------------------|---------------------------------------------------------------------------------------|
|   |                     |    |    |                                                                                       |
| 6 | valley<br>grassland |    |    |    |
|   |                     |    |    |    |
|   |                     |   |   |   |
|   |                     |  |  |  |
|   |                     |  |  |  |
|   |                     |  |  |  |
|   |                     |                                                                                     |                                                                                      |                                                                                       |



|   |                     |                                                                                     |                                                                                      |                                                                                       |
|---|---------------------|-------------------------------------------------------------------------------------|--------------------------------------------------------------------------------------|---------------------------------------------------------------------------------------|
|   |                     |    |    |                                                                                       |
| 7 | valley<br>grassland |    |    |    |
|   |                     |    |    |    |
|   |                     |   |   |   |
|   |                     |  |  |  |
|   |                     |  |  |  |
|   |                     |  |  |  |
|   |                     |  |  |  |



|   |                     |                                                                                     |                                                                                      |                                                                                       |
|---|---------------------|-------------------------------------------------------------------------------------|--------------------------------------------------------------------------------------|---------------------------------------------------------------------------------------|
|   |                     |    |    |                                                                                       |
| 8 | sloped<br>grassland |    |    |    |
|   |                     |    |    |    |
|   |                     |   |   |   |
|   |                     |  |  |  |
| 9 | sloped<br>grassland |  |  |  |
|   |                     |  |  |  |



|    |                     |                                                                                     |                                                                                      |                                                                                       |  |
|----|---------------------|-------------------------------------------------------------------------------------|--------------------------------------------------------------------------------------|---------------------------------------------------------------------------------------|--|
|    |                     |    |    |    |  |
|    |                     |    |    |    |  |
|    |                     |    |    |    |  |
|    |                     |   |   |   |  |
|    |                     |  |  |                                                                                       |  |
| 10 | sloped<br>grassland |  |  |  |  |
|    |                     |  |  |  |  |



|    |                     |                                                                                     |                                                                                      |                                                                                       |  |
|----|---------------------|-------------------------------------------------------------------------------------|--------------------------------------------------------------------------------------|---------------------------------------------------------------------------------------|--|
|    |                     |    |    |    |  |
|    |                     |    |    |    |  |
|    |                     |    |    |    |  |
|    |                     |   |   |   |  |
|    |                     |  |  |                                                                                       |  |
|    |                     |                                                                                     |                                                                                      |                                                                                       |  |
| 11 | sloped<br>grassland |  |  |  |  |
|    |                     |  |  |  |  |



|    |                     |                                                                                     |                                                                                      |                                                                                       |  |
|----|---------------------|-------------------------------------------------------------------------------------|--------------------------------------------------------------------------------------|---------------------------------------------------------------------------------------|--|
|    |                     |    |    |    |  |
|    |                     |    |    |    |  |
|    |                     |    |    |    |  |
|    |                     |   |   |   |  |
|    |                     |  |  |                                                                                       |  |
| 12 | sloped<br>grassland |  |  |  |  |
|    |                     |  |  |  |  |



|    |                       |                                                                                     |                                                                                      |                                                                                       |  |
|----|-----------------------|-------------------------------------------------------------------------------------|--------------------------------------------------------------------------------------|---------------------------------------------------------------------------------------|--|
|    |                       |    |    |    |  |
|    |                       |    |    |    |  |
|    |                       |    |    |    |  |
|    |                       |   |   |   |  |
|    |                       |  |  |                                                                                       |  |
| 13 | disturbed communities |  |  |  |  |
|    |                       |  |  |  |  |



|    |                       |                                                                                     |                                                                                      |                                                                                       |  |
|----|-----------------------|-------------------------------------------------------------------------------------|--------------------------------------------------------------------------------------|---------------------------------------------------------------------------------------|--|
|    |                       |    |    |    |  |
|    |                       |    |    |    |  |
|    |                       |    |    |    |  |
|    |                       |   |   |   |  |
|    |                       |  |  |                                                                                       |  |
|    |                       |                                                                                     |                                                                                      |                                                                                       |  |
|    |                       |                                                                                     |                                                                                      |                                                                                       |  |
|    |                       |                                                                                     |                                                                                      |                                                                                       |  |
|    |                       |                                                                                     |                                                                                      |                                                                                       |  |
|    |                       |                                                                                     |                                                                                      |                                                                                       |  |
| 14 | disturbed communities |  |  |  |  |
|    |                       |  |  |  |  |



|  |  |                                                                                     |                                                                                      |                                                                                      |  |
|--|--|-------------------------------------------------------------------------------------|--------------------------------------------------------------------------------------|--------------------------------------------------------------------------------------|--|
|  |  |    |    |   |  |
|  |  |    |    |   |  |
|  |  |    |    |   |  |
|  |  |   |   |  |  |
|  |  |  |  |                                                                                      |  |
