# Supplementary material for: A Semi-Automated Method to Extract Green and Non-Photosynthetic Vegetation Cover from RGB Images in Mixed Grasslands
Source: Sensors (Basel). 2020 Dec 1;20(23):6870. doi: 10.3390/s20236870 (PMC7731437; doi:10.3390/s20236870)
Supplement: Supplementary file 1 [file sensors-20-06870-s001.zip]

Archive with 5 entries (5 files):
- supplementary S3.pdf
- Cover_Fraction_from_RGB.py
- Cover_Fraction_from_RGB.tbx
- supplementary S1.docx
- supplementary S2.pdf
